# Supplementary material
Source: PubMed Central journal article supplement (PMC6420805)
Supplement: NIHMS981029-supplement-1.pdf [file NIHMS981029-supplement-1.pdf]

1     **Supplemental Materials**

2     **Supplemental Methods**

3     *Study Design*

4     Twenty infant rhesus macaques (RM; 1-2 weeks old) were IV infused with either 10mg/kg anti-  
5     HIV Env gp120 monoclonal antibody (mAb) DH378 (n=6), 10mg/kg anti-influenza HA mAb  
6     CH65 (n=6), 30mg/kg  $\alpha$ -HA mAb CH65 (n=2), or 30mg/kg of a tri-mAb cocktail composed of  
7     stoichiometric equivalents of 3 anti-HIV Env gp120 mAbs - DH377, DH378, and DH382 (n=6) -  
8     one hour prior to the first oral SHIV challenge. Power calculations were employed to determine  
9     that with these animal numbers, this study would have >65% power to detect a significant  
10    difference in rate of virus acquisition between control mAb-treated and HIV Env-specific mAb-  
11    treated groups when correcting for two comparison groups of breast milk mAb-infused RMs  
12    (p=0.025, 1 sided test). This power calculation assumed a 100% infection rate in control mAb-  
13    treated animals and a <30% infection rate in HIV Env-specific mAb-treated animals. All infant  
14    RMs enrolled in this study were prescreened via ELISA to exclude animals demonstrating  
15    preexisting immunity to the human mAbs selected for infusion. Animals were subjected to 3 oral  
16    challenges per day for 3 consecutive days consisting of 5,000 TCID<sub>50</sub> SHIV-1157ipd3N4 (NIH  
17    AIDS Reagent Program) incubated in 1mL of RPMI containing 1 $\mu$ g/mL DH378, 1 $\mu$ g/mL CH65  
18    (n=6), 3 $\mu$ g/mL CH65 (n=2), or 3 $\mu$ g/mL of the tri-mAb cocktail for 15 minutes, followed by  
19    dilution in ~10mL formula feed to simulate oral acquisition via breastfeeding. Animals were re-  
20    infused with their respective antibody infusions one week after the initial infusion. Blood and  
21    saliva (via weck cell sponges) were collected before each infusion, 1 hour after each infusion, 1  
22    day after each infusion, and at weeks 2, 4, 6, and 8 of the study. All animals were necropsied at  
23    week 8 of the study and tissues were collected. The study endpoint was set at 8 weeks post

challenge following an infusion kinetics pilot study in 2 control mAb-treated animals, LD65 and LD77. Tissues were processed either fresh or after overnight shipping at 4°C to isolate mononuclear cells for sorting, or tissues were fixed in formalin for in situ hybridization. Mononuclear cells were isolated by density gradient centrifugation with Ficoll-Paque (GE Healthcare, Waukesha, WI) for lymph nodes, spleen, blood, and tonsils and with Percoll (Sigma-Aldrich) for intestinal tissues, as previously described<sup>1</sup>. This study was unblinded and not randomized. Of note, DH378-treated animal LI68 died due to unrelated causes (choking event) prior to the 4-week time point and CH65-treated animal LH07 necropsy sample shipment was delayed resulting in delayed sample processing.

#### *Ethics Statement*

RMs were housed at the Tulane National Primate Research Center (TNPRC) in Tulane, LA in accordance with the standards of the American Association for Accreditation of Laboratory Animal Care. The protocol was approved by the TNPRC's Institutional Animal Care and Use Committee under OLAW Assurance Number P0212 and additionally reviewed by Duke University's Institutional Animal Care and Use Committee under OLAW Assurance Number A060-16-03. TNPRC is AAALAC accredited. This study was carried out in strict accordance with the recommendations in the *Guide for the Care and Use of Laboratory Animals*<sup>2</sup> of the National Institutes of Health (NIH) and the Weatherall report on *The use of non-human primates in research*<sup>3</sup>. All procedures were performed under anesthesia using ketamine hydrochloride and scheduled to limit the number of times an animal was under anesthesia. All efforts were made to minimize stress, improve housing conditions, and provide enrichment opportunities (e.g., social housing when possible, objects to manipulate in cage, varied food supplements, foraging and

task-oriented feeding methods, interaction with caregivers and research staff). Animals were euthanized by Telazol and Buprenorphine IM injection with a secondary method to include vital organ harvest in accordance with the recommendations of the panel on Euthanasia of the American Veterinary Medical Association. Human donor PBMCs used to assess mAb and serum ADCC functionality were from a previously existing collection<sup>4</sup>. Briefly, blood samples from HIV-1 seronegative donors providing written consent were collected between June 2007 and July 2013 at Duke University, Durham, NC according to protocols approved by the Duke University Institutional Review Board. Samples were anonymized prior to processing and cryopreservation.

*Production of infusion mAbs*

MAbs DH377, DH378, and DH382 were obtained through antigen-specific B cell sorting and Ig variable gene amplification, as previously described<sup>5</sup>. Of note, the IgG1 4A backbone was used containing alanine substitutions designed to enhance binding to Fc $\gamma$ -receptor IIIa (S298A, E333A, K334A) and Fc-receptor neonatal (N434A). MAbs were produced through transient transfection either by the manufacturer Catalent (DH378; Catalent, Somerset, NJ) or at the Duke Human Vaccine Institute (DH377, DH382, CH65), as previously described<sup>6</sup>. Briefly, appropriate heavy and light chain pairs for each mAb were transiently transfected in Expi293 cells using the ExpiFectamine 293 transfection reagents (ThermoFisher Scientific), according to manufacturer instructions. Transfected cultures were incubated at 37°C, 8% CO<sub>2</sub> for 4 days prior to supernatant harvest and mAb purification with Pierce Protein A agarose beads (ThermoFisher Scientific). Purified mAbs were tested via SDS-Page coomassie and western blot, and quantified via Nanodrop. Infusion mAb endotoxin levels were measured using the Pyrogen-5000 LAL Assay (Lonza), according to manufacturer instructions.

*Prescreening for pre-existing anti-idiotypic responses and MHC typing of selected infants*

Preexisting immunity to the human mAbs selected for infusion was measured by ELISA on pre-infusion serum prior to assigning the infant to the study. Plates were coated with 3µg/mL of either DH377, DH378, DH382, or positive controls goat anti-monkey IgG (Rockland, Limerick, PA) or goat anti-monkey IgA (Rockland, Limerick, PA). Coated plates were then blocked and incubated with a serial dilution series of pre-infusion/pre-challenge infant serum. To measure serum IgG and IgA binding, samples were subsequently incubated with HRP-conjugated mouse anti-monkey IgG (Southern Biotech, Birmingham, AL) or mouse anti-monkey IgA (Southern Biotech, Birmingham, AL), respectively. Of note, both secondary antibodies were not cross reactive to human mAbs. Absorbance was detected with SureBlue Reserve substrate as described above. Samples with absorbance three standard deviations above the mean absorbance of negative control wells at sample dilutions greater or equal to 1:100 were considered positive and ruled out for inclusion in the study.

MHC typing was performed subsequent to assigning an animal to the study on mononuclear cells or isolated genomic DNA by the Research Services division of the Wisconsin National Primate Research Center. Briefly, exon 2 of MHC class I, class I DRB, class II DPA/B, and the class I DQA/B loci were amplified in a Fluidigm Access Array assay. The resultant amplicons were sequenced with the Illumina MiSeq platform. Sequences were then compared to a database of RM alleles such that haplotype determinations could be made for each animal.

*HIV-1 Neutralization in TZM-bl Cells*

Neutralizing antibody titers were measured by the reduction in Tat-regulated Luc reporter gene expression in a TZM-bl (NIH AIDS Reagent Program) reporter cell assay, as previously described<sup>7</sup>. Briefly, a dose of virus containing ~150,000 relative luminescence unit (RLU) equivalents was incubated with 3-fold serial dilutions of mAb or serum in duplicate for one hour at 37°C in 96-well flat-bottom culture plates. TZM-bl cells were added at 10<sup>4</sup> cells per well in a 100-μl volume. Eight wells of TZM-bl cells alone and TZM-bl cells with virus alone were run on each plate to contextualize maximum and minimum RLUs. After 48 hour incubation at 37°C, samples were incubated in Bright-Glo luciferase reagent (Promega, Madison, WI) for 2 minutes at room temperature. Luminescence was measured from the resulting cell lysate in a 96-well black solid plate on the Victor X3 Light Plate Reader. The 50% inhibitory dose (ID<sub>50</sub>) titer was calculated as the serum dilution that caused a 50% reduction in RLUs compared to virus-only controls after subtraction of the TZM-bl-only control RLUs. Alternatively, the 50% inhibitory concentration (IC<sub>50</sub>) titer was calculated as the reagent concentration that caused a 50% reduction in RLU relative to virus-only controls.

#### *Tissue Mononuclear Cell Viral Coculture*

Tissue-associated infectious virus titer was assessed through Tat-regulated Luc-F reporter gene expression to quantify infection of TZM-bl reporter cells after coculture with tissue mononuclear cells isolated from RMs. Isolated mononuclear cells from lymphoid and GI tissues were serially diluted in a 96 well format with 10<sup>4</sup> TZM-bl cells/well added in coculture. This coculture was incubated for 72 hours at 37°C and 5% CO<sub>2</sub> prior to luminescence quantification with the Brightglow luminescence detection system (Promega, Madison, WI). For quantitative comparison, tissues were tested with a minimum of 2 replicates to employ the Reed-Meunch

method to estimate the tissue-associated infectious virus titer in units of viable mononuclear cells. Tissue-associated infectious virus titer was calculated as the number of viable cells required to sustain detectable infection in 50% of the replicates, with the detection threshold established as 3 standard deviations above the mean luminescence output of PBMCs from 3 naive RMs (3,019 RLU). Of note, cell number availability was variable between samples, resulting in a range of detection limits (range= $2 \times 10^5$ - $4 \times 10^6$  mononuclear cells) and number of replicates (2-8 replicates) for the assay.

### *Plasma Viral RNA Load Quantification*

Reverse transcriptase (RT) PCR was performed to determine the SHIV-1157ipd3N4 RM plasma RNA load, as previously described<sup>8</sup>. Briefly, viral RNA was isolated from plasma viral pellets using the QIAasymphony Virus/Bacteria Midi kit on the QIAasymphony SP automated sample preparation platform (Qiagen, Hilden, Germany). A standard curve was generated from serial dilutions of an RNA transcript of the first 731bp of SIVmac239 gag. cDNA was produced from the resulting sample and standard RNA suspensions in a reverse transcriptase reaction using SuperScript III RT enzyme (Invitrogen), PCR nucleotides (Roche, Pleasanton, CA), and RNase Out (Invitrogen) with the specific reverse primer 5'-CAC TAG GTG TCT CTG CAC TAT CTG TTT TG -3' using an optimized version of the manufacturer's protocol. cDNA was used in quantitative real-time PCR using Gene Expression Mastermix (Applied Biosystems, Foster City, CA) and target specific labeled probe 5'-/56-FAM/CTT CCT CAG TGT GTT TCA CTT TCT CTT CTG CG/3BHQ\_1/-3' and forward 5'-GTC TGC GTC ATC TGG TGC ATT C -3' and reverse primers 5'-CAC TAG GTG TCT CTG CAC TAT CTG TTT TG -3' (Integrated DNA

Technologies, Coralville, IA). RNA copies per milliliter were determined by dividing the copy number by the volume of plasma from which SHIV RNA was extracted.

#### *Mononuclear Cell Provirus Quantification*

RM CD4<sup>+</sup> T cell-associated genomic DNA (gDNA) was isolated from various GI and lymphoid tissues with the QIAamp DNA kit (Qiagen, Hilden, Germany) and quantified using the Biorad QX200 droplet digital PCR System according to the manufacturer instructions (Biorad, Hercules, CA). SHIV *gag* specific primers (SIVmac F 5'- GTC TGC GTC ATC TGG TGC ATT C-3' and SIVmac R 5'- CAG TAG GTG TCT CTG CAC TAT CTG TTT TG -3') and probe [FAM]-CTT CCT CAG TGT GTT TCA CTT TCT CTT CTG CG-[TAMRA] were used to amplify and quantify total SHIV provirus copies. The cell count per sample was estimated using the genomic reference gene TERT, which was quantified in multiplex with the *gag* quantification using a human TERT-specific reference assay (Biorad, Hercules, CA). This gene was utilized as it was found to have high homology with RMs. The SHIV proviral load in SHIV copies/million CD4<sup>+</sup> T cells was calculated by dividing the SHIV DNA copy number by the TERT copy number divided by 2 multiplied by 10<sup>6</sup> cells.

Some of the ddPCR results were validated through comparison to TaqMan Real-Time qPCR, as previously described<sup>9</sup>. Standard curves from serial dilutions starting at 1 X 10<sup>8</sup> copies/ml of SHIV *gag* plasmid and from the genomic reference gene albumin were used to relate cycle threshold (Ct) values to gene copy numbers. All reactions were performed on the StepOnePlus Real-Time PCR System (ThermoFisher Scientific).

#### *Saliva Weck-Cel sample collection and extraction*

RM saliva was collected with Weck-Cel ophthalmic sponges (Beaver-Visitec, Waltham, MA), as previously described<sup>10</sup>. The Weck-Cel sponges were then transferred to Spin-X (Corning Life Sciences, Corning, NY) centrifuge tubes without filters and incubated twice with 300 µl of an extraction buffer per sample (PBS containing 0.25% BSA and 1X protease inhibitor cocktail (Sigma)). Samples were incubated for five minutes and ten minutes in the first and second incubations, respectively. After each incubation, antibodies were extracted from the Weck-Cel sponges by centrifugation and filtered on Spin-X centrifuge tubes with 0.22µm filters. The volume of sample extract was determined by the mass of the sample tubes compared to the average mass of extraction tubes from blank Weck-Cel sponges that underwent mock extractions with an assumed density of saliva of 1kg/L.

#### *Measurement of virus-specific IgG levels in plasma and saliva*

Enzyme-linked immunosorbent assays (ELISA) were performed as previously described<sup>11</sup>. Briefly, ELISA plates (384 wells; Corning Life Sciences, Corning, NY) were coated overnight at 4°C or for one hour at 20°C with 30 µg/well gp140 1086c, MN.gp41, Bio-V3.C, or Hemagglutinin (HA Solomon Islands; Protein Sciences Corporation, Meriden, CT) in 0.1 M sodium bicarbonate. Plates were blocked with Superblock (PBS containing 4% whey protein, 15% normal goat serum, and 0.5% Tween 20). RM plasma or saliva Weck-Cel extracts were diluted in Superblock and incubated on the plate for one hour at 20°C. Plasma or saliva IgG was bound with 10µl/well horseradish peroxidase (HRP)-conjugated goat anti-human IgG (Jackson ImmunoResearch, West Grove, PA). Binding was quantified by incubation with room temperature SureBlue Reserve Microwell Substrate (VWR, Radnor, PA) followed by addition of TMB (3,3',5,5'-tetramethylbenzidine) Stop Solution (VWR, Radnor, PA). Absorbance of the

wells was read at 450 nm using a Spectramax Plus spectrophotometer (Molecular Devices, Sunnyvale, CA) immediately after addition of the stop solution. Antibody concentrations in serum and saliva were identified using purified monoclonal antibody 4-parameter standard curves of DH378, CH65, 7B2 (anti-gp41 IgG1 mAb), or the tri-antibody cocktail ranging from 0 to 300ng/mL with 3-fold dilutions.

To quantify A32 blocking, plates coated with 1086c gp120 were blocked and incubated with sample as described above. Plates were then incubated with 200-ng/ml biotinylated A32 mAb for one hour. Inhibition of biotin-A32 binding was detected with streptavidin-HRP at 1:30,000, followed by incubation with SureBlue Reserve substrate and subsequent application of TMB Stop Solution. Absorbance of the wells was read at 450 nm using a Spectramax Plus spectrophotometer immediately after addition of the stop solution. The concentration of A32-blocking antibodies in serum was determined using a 4-parameter standard curve of the tri-antibody cocktail ranging from 0 to 60 µg/ml with 3-fold dilutions.

*Antibody Dependent Cellular-Cytotoxicity*

ADCC activity of the purified mAbs and peripheral serum samples was determined by our luciferase-based cell killing assay as previously described<sup>12, 13</sup>. Briefly, CEM.NKR<sub>CCR5</sub> target cells (NIH AIDS Reagent Program) were infected with SHIV1157-ipd3N4-IMC encoding a *Renilla* luciferase reporter gene<sup>14</sup>. PBMC from a healthy HIV-seronegative donor with the heterozygous 158F/V and 131H/R genotypes for Fcγ-receptor IIIa and Fcγ-receptor IIa, respectively, were used as a source of effector cells. PBMC were added to SHIV-infected target cells in wells of a 96-well plate at a ratio of 30:1. DH382 and CH65 were included as positive and negative controls, respectively. Assay plates were incubated with serial dilutions of RM

serum for 6h at 37°C and 5% CO<sub>2</sub>. ADCC activity (percent specific killing) was calculated from the change in Relative Light Units (RLU) (ViviRen luciferase assay; Promega, Madison, WI) resulting from the loss of intact target cells in wells containing effector cells, target cells, and serum or mAb samples compared to amounts in control wells containing target cells and effector cells alone. ADCC activity is reported as either the maximum percent killing observed for each sample or the ADCC endpoint titer, which is defined as the last dilution of serum that intersects the positive cutoff (20% specific killing) after subtraction of the average non-specific background activity observed for plasma collected prior to infusion of mAb from all available animals (n=15).

#### *Flow Cytometry*

RM PBMCs or tissue mononuclear cells were stained with a panel of fluorochrome-conjugated antibodies containing CD3 fluorescein isothiocyanate (FITC), CD28 phycoerythrin (PE), CD45 peridinin chlorophyll protein (PerCP), CD8 V500, CD95 PE-Cy7, CD4 allophycocyanin (APC), CD20 APC-H7, and CCR7 Brilliant Violet 421 (BV421) (all from BD Biosciences, San Jose, CA). Yellow Vital dye was added to the panel as a live/dead cell discriminator for some samples. PBMCs from the week 2 timepoint were stained with a modified panel with Aqua Vital Dye and CD8-APC-R700 (BD Biosciences, San Jose, CA) replacing Yellow Vital Dye and CD8 V500, respectively. Additionally, the modified panel added CD69 BV605 (BD Biosciences, San Jose, CA), CD25 BV711 (Biolegend, San Diego, CA), and HLA-DR PE-CF594 (Texas Red; BD Biosciences, San Jose, CA). After 30 minutes of antibody incubation at 4 °C, cells were washed in PBS and incubated with vital dye for 30 minutes at 4°C. Cells for phenotyping were then fixed with 2% formaldehyde solution. Stained cells were acquired on an LSRII flow cytometer (BD

Biosciences, San Jose, CA). Unfixed cells for sorting were resuspended in PBS with 2% FBS. CD4<sup>+</sup> and CD8<sup>+</sup> cells were bulk sorted and data was acquired on a FACS Aria II cytometer (BD Biosciences, San Jose, CA). CD4<sup>+</sup> and CD8<sup>+</sup> T cells were positively selected from isolated tissue mononuclear cells by sequential selection of lymphocytes, FSC and SSC singlets, viable cells, CD45<sup>+</sup> leukocytes, CD3<sup>+</sup> T cells, and CD4<sup>+</sup> versus CD8<sup>+</sup> T cells. Central memory, effector memory, and naïve CD4<sup>+</sup> and CD8<sup>+</sup> T cell populations were characterized as CD28<sup>+</sup>/CD95<sup>+</sup>, CD28<sup>-</sup>/CD95<sup>+</sup>, and CD28<sup>+</sup>/CD95<sup>-</sup>, respectively. Transitional memory T cells were identified as CD28<sup>+</sup>/CCR7<sup>-</sup>. Analysis of all acquired data was performed using FlowJo software (TreeStar, Ashland, OR).

*In Situ Hybridization*

In situ hybridization for the detection and quantification of SHIV gag RNA was performed using the Affymetrix protocol according to manufacturer instruction (Affymetrix, Santa Clara, CA). Briefly, fresh dissected RM tissue samples were fixed in Zinc buffered formalin (Anatech Ltd, Battle Creek, MI) at room temperature for 24-48 hours. Tissue specimens were then paraffin-embedded, sectioned at 5µm, and mounted on positively-charged glass slides. Slide-mounted tissue sections were dried at room temperature overnight and then incubated at 60°C for 1 hour to immobilize tissue sections. Slides were deparaffinized in xylene and washed twice in 100% ethanol. The sections then underwent the recommended heat induced epitope retrieval and were digested with 1:100 Protease QF solution (Affymetrix, Santa Clara, CA), followed by hybridization with SHIV gag-specific probe, JN560961.1 Simian-Human Immunodeficiency Virus clone SHIV\_AD8 (Affymetrix, Santa Clara, CA). SHIV gag-specific signal was amplified in subsequent hybridizations with 1:100 PreAmp1 QF and 1:100 Amp1QF (Affymetrix, Santa

Clara, CA). Following these hybridizations, the targeted virus was labeled with Fast Red chromogen (Affymetrix, Santa Clara, CA). After 3 washes in PBS, slides were blocked in a solution of PBS with 0.02% fish skin gelatin (Sigma) and 10% normal goat serum for 40 minutes. Rabbit anti-human CD3 primary antibody (Dako, Glostrup Municipality, Denmark) was diluted 1:100 and applied to slides for 60 minutes at room temperature. Slides were washed three times with phosphate buffered saline containing 0.02% fish skin gelatin and 0.01% TritonX100 (Fisher). The secondary antibody, Alexa Fluor 488-conjugated goat anti-rabbit IgG, was applied to slides for 40 minutes. Following a series of washes, Topro3 DAPI nuclear stain (Invitrogen) was added to each slide. All slides were imaged with a Leica TCS SP8 confocal microscope. Average numbers of CD3<sup>+</sup> cells and SHIV gag RNA<sup>+</sup> cells were obtained from 10 0.5-0.75 mm fields of each stained tissue. The number of SHIV RNA producing cells was reported as the number of SHIV gag RNA<sup>+</sup> cells per 1,000 CD3<sup>+</sup> T cells.

#### *Transmitted/Founder Analysis*

Transmitted/Founder (T/F) viral sequences were obtained by single genome amplification (SGA) with subsequent direct amplicon sequencing, as previously described<sup>15</sup>. Briefly, viral RNA was isolated from plasma 2 weeks post infection from each animal by the QiaAmp viral RNA mini kit (Qiagen, Hilden, Germany). cDNA was generated using SuperScript III reverse transcriptase mix (Invitrogen) and antisense primer SHIVEnvR3-out 5' -CTA ATT CCT GGT CCT GAG GTG TAA TCC TG -3' located in the nef reading frame (nt 9250-9278 SHIV1157ipd3N4). The resulting cDNA suspension was diluted and PCR amplified in Platinum Taq DNA polymerase High Fidelity (Invitrogen) such that 30% of reactions were positive to maximize the likelihood of single genome amplification. A first round of PCR amplification was conducted using

275 SHIVEnvR3-in and SHIVEnvF4-out 5'- TCA TAT CTA TAA TCG TCA CGG AGA CAC TC -  
276 3' (nt 5768-5796 in SHIV1157ipd3N4) as primers. A second round of PCR amplification was  
277 conducted using 2µl of first round PCR product as template and SHIVEnvF2-in 5'- GTG TTG  
278 CTT TCA TTG CCA AGT TTG T -3' (nt 6040-6064) and SHIVEnvR2-in 5'-TGG TAT GAT  
279 GCC TTC TTC CTT TTC T-3' (nt 9219-9243) as primers. Amplification conditions for round 1  
280 and round 2 PCR were 1 cycle of 94°C for 2 minutes, 35 cycles of 94°C for 15 seconds, 55°C for  
281 30 seconds, and 68°C for 4 minutes, followed by 1 cycle of 68°C for 10 minutes. Round 2 PCR  
282 amplicons were visualized by agarose gel electrophoresis and directly sequenced using an  
283 ABI3730xl genetic analyzer (Applied Biosystems, Foster City, CA). Full sequences were  
284 constructed from overlapping sequences from each amplicon in Sequencher (Gene Codes, Inc.,  
285 Ann Arbor, MI). Sequences with two or more double peaks were discarded, as this indicates  
286 amplification from multiple templates. Sequences with one double peak were retained with the  
287 double peak attributed to Taq polymerase error. Ambiguities in these sequences were read as the  
288 consensus sequence. Sequence alignments and phylogenetic trees were constructed using  
289 clustalW and Highlighter plots were created using the tool at <http://www.lanl.gov>.

290 To identify and enumerate T/F variants, the following conditions were applied. Clusters  
291 of related sequences were visually analyzed using phylogenetic trees (Figtree v1.4) and  
292 sequences containing <2 mutations were considered a single variant. Variants containing ≥2  
293 mutations were considered as progeny of distinct T/F genomes. Potential G-A hypermutations  
294 caused by APOBEC 3G/3F were identified using Hypermut algorithm 2.0 and were reverted for  
295 analysis if there were ≤ 2 present. Sequences that had >3 potential APOBEC 3G/3F mutations  
296 were not considered for T/F analysis (Hypermut, <http://www.hiv.lanl.gov>)<sup>16</sup>. Sequence clusters  
297 of ≥ 2 sequences with ≥2 shared mutations were considered as distinct T/F variants.

298

299 *Provirus env cloning and pseudovirus preparation*

300 Genomic DNA (gDNA) was isolated from CD4<sup>+</sup> T cells to study proviral *env* populations from  
301 animals negative for plasma viral load by Qiagen Allprep DNA/RNA mini kit (Qiagen, Hilden,  
302 Germany). SHIV *env* amplification through bulk nested PCR was done using this gDNA as  
303 template, as described above. Bulk PCR products of envelope gene from animals LG19 and  
304 LH73 were cloned in pcDNA3.1/V5-His-Topo (Invitrogen) using shotgun cloning methods. To  
305 generate pseudoviruses capable of one round of infection, plasmids containing SHIV envelopes  
306 were cotransfected with a second plasmid containing a subtype B *env* deficient HIV genome  
307 (SG3 $\Delta$ *env*) in 293T cells (Invitrogen), as previously described <sup>7</sup>. The infectivity of pseudotyped  
308 viruses was screened by single round infection of TZM-bl cells followed by detection of Tat-  
309 regulated luminescence with the Bright-Glo luciferase reagent (Promega, Madison, WI), as  
310 described above. Infectivity was reported as relative luminescence units (RLUs) and compared  
311 to that of a mock infection of TZM-bl cells (~500 RLU).

312

313 *Statistical Analysis*

314 Statistical tests were performed with SAS v9.4 (SAS Institute, Cary NC). Comparisons of viral  
315 load, proviral load (copies/million cells), and the number of T/F variants in infants from each  
316 mAb treatment group were performed using the exact Wilcoxon test. The proviral load (binary  
317 designation), and the number of infants with detectable SHIV in each mAb treatment group were  
318 compared with Fisher's exact test. False discovery rate (FDR) p-value correction was used to  
319 correct for multiple comparisons. A p-value of <0.05 (two-tailed) was considered as significant  
320 for all analyses.

321  
322  
323  
324  
325  
326  
327  
328  
329  
330  
331  
332  
333  
334  
335  
336  
337  
338  
339  
340  
341

**Supplemental References**

1. Amos JD, Wilks AB, Fouda GG, Smith SD, Colvin L, Mahlokozera T *et al.* Lack of B cell dysfunction is associated with functional, gp120-dominant antibody responses in breast milk of simian immunodeficiency virus-infected African green monkeys. *Journal of virology* 2013; **87**(20): 11121-11134.
2. Resources IoLA. Guide for the care and use of laboratory animals. National Academy Press: Washington, DC, 1996.
3. Weatheall D. The use of non-human primates in research; 2006.
4. Sambor A, Garcia A, Berrong M, Pickeral J, Brown S, Rountree W *et al.* Establishment and maintenance of a PBMC repository for functional cellular studies in support of clinical vaccine trials. *J Immunol Methods* 2014; **409**: 107-116.
5. Sacha CR, Vandergrift N, Jeffries TL, Jr., McGuire E, Fouda GG, Liebl B *et al.* Restricted isotype, distinct variable gene usage, and high rate of gp120 specificity of HIV-1 envelope-specific B cells in colostrum compared with those in blood of HIV-1-infected, lactating African women. *Mucosal Immunol* 2015; **8**(2): 316-326.

6. Bonsignori M, Kreider EF, Fera D, Meyerhoff RR, Bradley T, Wiehe K *et al.* Staged induction of HIV-1 glycan-dependent broadly neutralizing antibodies. *Sci Transl Med* 2017; **9**(381).
7. Li M, Gao F, Mascola JR, Stamatatos L, Polonis VR, Koutsoukos M *et al.* Human immunodeficiency virus type 1 env clones from acute and early subtype B infections for standardized assessments of vaccine-elicited neutralizing antibodies. *Journal of virology* 2005; **79**(16): 10108-10125.
8. Wilks AB, Perry JR, Ehlinger EP, Zahn RC, White R, Gauduin MC *et al.* High cell-free virus load and robust autologous humoral immune responses in breast milk of simian immunodeficiency virus-infected african green monkeys. *Journal of virology* 2011; **85**(18): 9517-9526.
9. Desire N, Dehee A, Schneider V, Jacomet C, Goujon C, Girard PM *et al.* Quantification of human immunodeficiency virus type 1 proviral load by a TaqMan real-time PCR assay. *J Clin Microbiol* 2001; **39**(4): 1303-1310.
10. Fouda GG, Eudailey J, Kunz EL, Amos JD, Liebl BE, Himes J *et al.* Systemic administration of an HIV-1 broadly neutralizing dimeric IgA yields mucosal secretory IgA and virus neutralization. *Mucosal Immunol* 2017; **10**(1): 228-237.

364 11. Jeffries TL, Jr., Sacha CR, Pollara J, Himes J, Jaeger FH, Dennison SM *et al.* The  
365 function and affinity maturation of HIV-1 gp120-specific monoclonal antibodies derived  
366 from colostral B cells. *Mucosal Immunol* 2016; **9**(2): 414-427.

367

368 12. Permar SR, Fong Y, Vandergrift N, Fouda GG, Gilbert P, Parks R *et al.* Maternal HIV-1  
369 envelope-specific antibody responses and reduced risk of perinatal transmission. *The*  
370 *Journal of clinical investigation* 2015; **125**(7): 2702-2706.

371

372 13. Pollara J, McGuire E, Fouda GG, Rountree W, Eudailey J, Overman RG *et al.*  
373 Association of HIV-1 Envelope-Specific Breast Milk IgA Responses with Reduced Risk  
374 of Postnatal Mother-to-Child Transmission of HIV-1. *Journal of virology* 2015; **89**(19):  
375 9952-9961.

376

377 14. Edmonds TG, Ding H, Yuan X, Wei Q, Smith KS, Conway JA *et al.* Replication  
378 competent molecular clones of HIV-1 expressing Renilla luciferase facilitate the analysis  
379 of antibody inhibition in PBMC. *Virology* 2010; **408**(1): 1-13.

380

381 15. Keele BF, Li H, Learn GH, Hraber P, Giorgi EE, Grayson T *et al.* Low-dose rectal  
382 inoculation of rhesus macaques by SIVsmE660 or SIVmac251 recapitulates human  
383 mucosal infection by HIV-1. *The Journal of experimental medicine* 2009; **206**(5): 1117-  
384 1134.

385

16. Rose PP, Korber BT. Detecting hypermutations in viral sequences with an emphasis on G  
--> A hypermutation. *Bioinformatics* 2000; **16**(4): 400-401.

**Supplemental Figures**

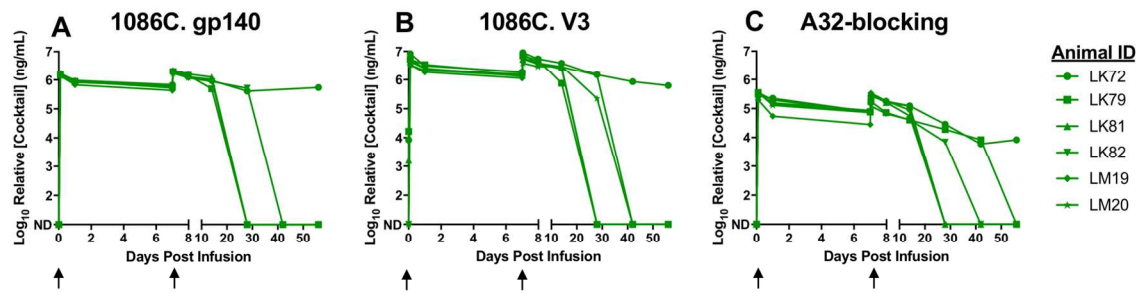

**Figure S1. Decay of passively infused mAbs in serum of tri-mAb cocktail-treated infant RMs.** Concentrations of infused mAbs in serum from pre infusion to 8 weeks post infusion are depicted for tri-mAb cocktail-treated animals. **A)** 1086C. gp140, **B)** 1086C. V3 peptide, and **C)** A32-blocking ELISAs were employed to estimate the relative concentrations of DH377 and DH382 within the tri-mAb cocktail-treated animals over the course of the study. Black arrows indicate systemic mAb infusions at days 0 and 7. ND indicates not detectable.

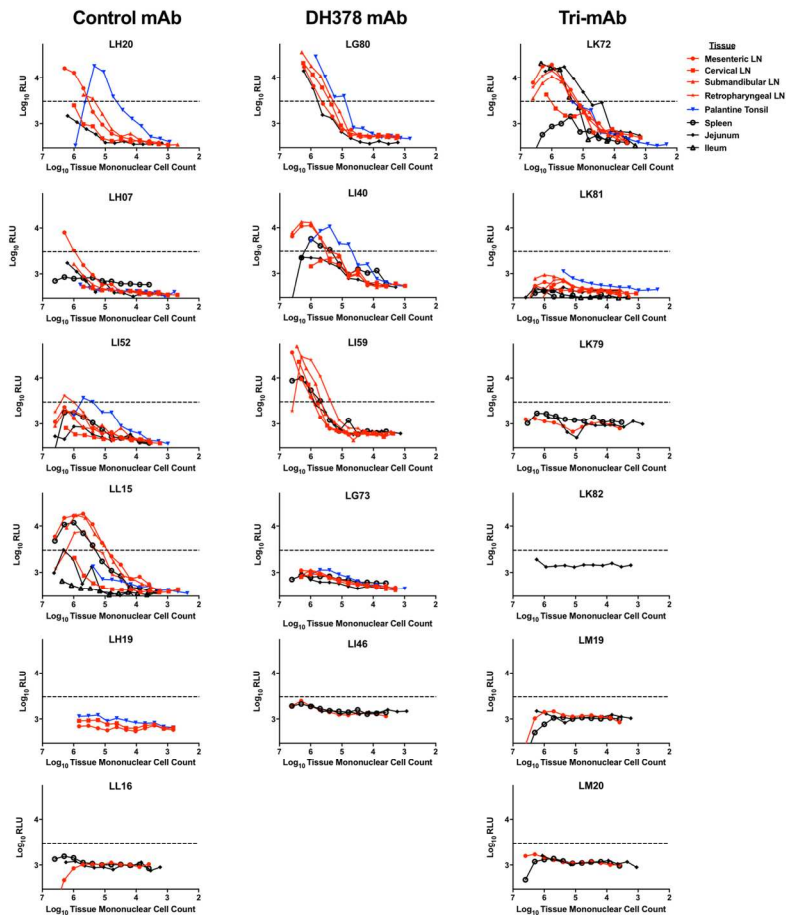

**Figure S2. Tissue-associated infectious SHIV levels measured through tissue mononuclear cell coculture with TZM-bl reporter cells.** Mononuclear cells isolated from tissues 8 weeks after oral SHIV-1157ipd3N4-challenge of control mAb-, DH378 mAb-, and tri-mAb-treated infant RMs were serially diluted and cocultured with TZM-bl reporter cells for 72hrs, followed by luminescent detection of tissue-associated SHIV infectivity in relative luminescence units (RLU). The RLU limit of detection for positive tissue-associated SHIV infection (dashed line) was defined as 3 standard deviations above the mean maximum RLUs elicited from PBMCs of unchallenged control RMs (n=3) in the coculture assay.

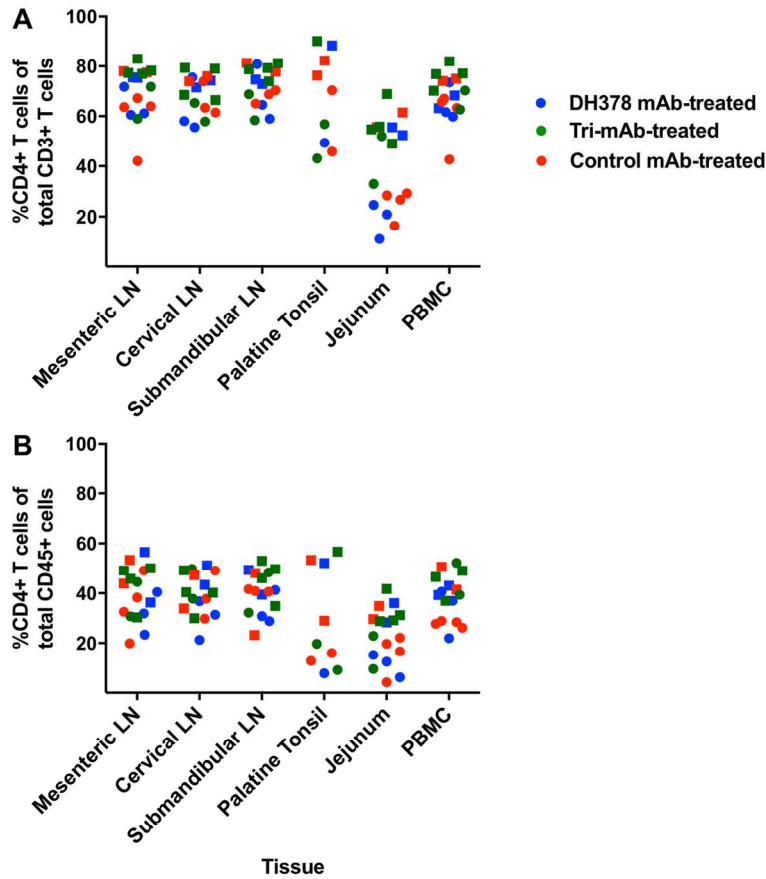

**Figure S3. CD4+ T cell proportions in tissues of mAb-treated, SHIV-1157ipd3N4 challenged infant RMs.** A) Proportion of CD4+ T cells of total T cells and B) total CD45+ mononuclear cells in various lymphoid and GI tissues of mAb-treated and orally SHIV-challenged infant RMs at necropsy (8 weeks post infusion). Red, blue, and green symbols indicate control mAb-, DH378-mAb, and tri-mAb-treated animals, respectively. Squares indicate non-viremic animals, while circles indicate viremic animals.

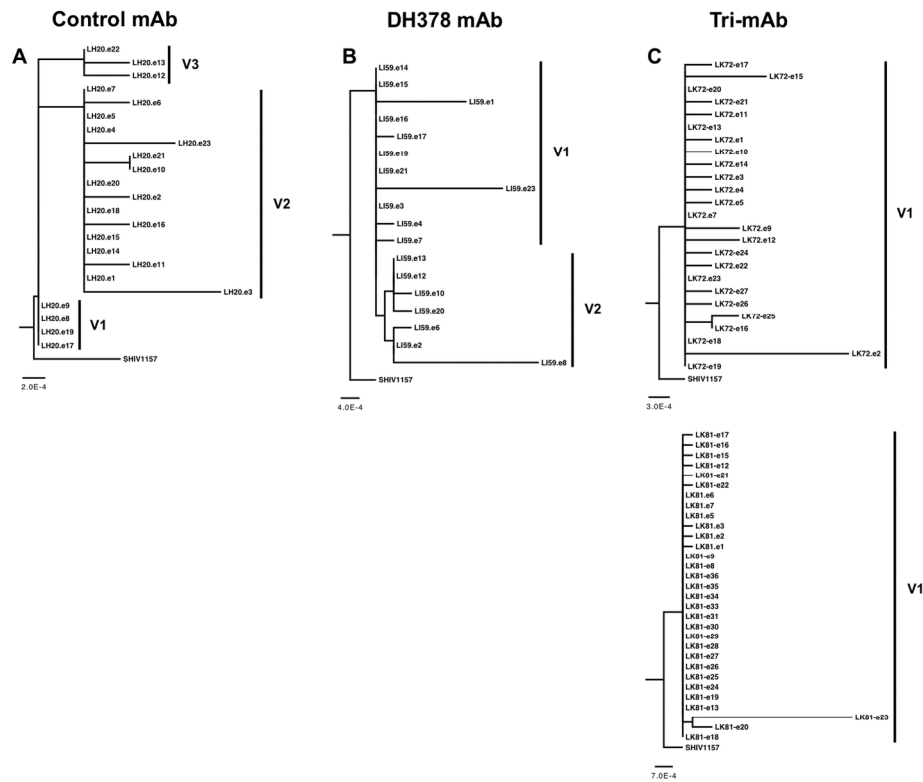

**Figure S4. Representative phylogenetic trees of SHIV *env* variants isolated from passively mAb-infused, SHIV-1157ipd3N4- challenged infant RMs.** Standard SGA techniques were used to isolate the SHIV envelope gene from plasma of **A)** control mAb-treated, **B)** DH378 mAb-treated, and **C)** tri-mAb-treated infant RMs, and amplicons were sequenced. Clustalw and the Kimura 2 Parameter (K2P) method were used to align amplicons and construct neighbor joining phylogenetic trees rooted at the SHIV-1157ipd3N4 envelope gene (Acc. No. DQ779174). Distinct variant clusters (V; indicated by bold lines) within each animal were defined as having  $\geq 2$  unique mutations that were observed in  $\geq 2$  amplicons.

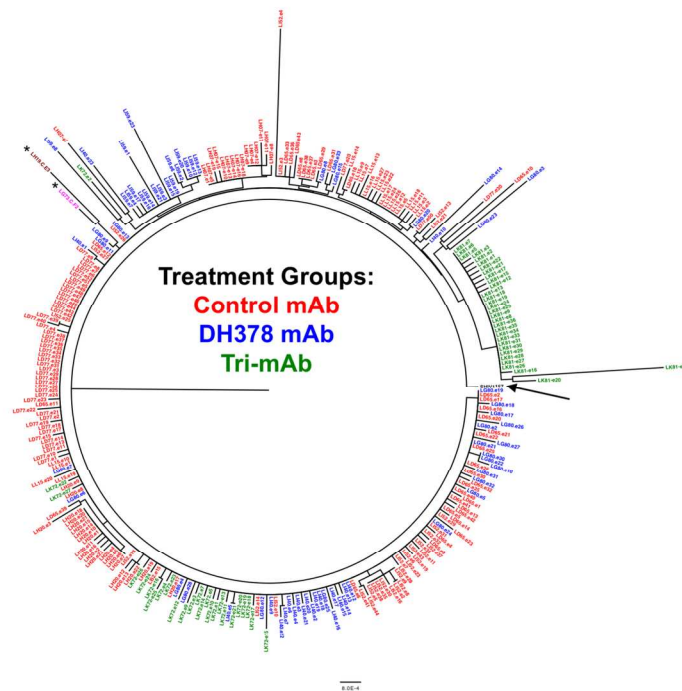

**Figure S5. Phylogenetic tree analysis of SHIV *env* isolated from passively breastmilk mAb-infused infant RMs 2 weeks after oral SHIV challenge.** Standard SGA techniques were used to isolate SHIV *env* genes from each animal 2 weeks following oral SHIV challenge and amplicons were sequenced. Clustalw and Kimura 2 Parameter (K2P) method were used to align amplicons and construct a neighbor joining phylogenetic tree rooted at the SHIV-1157ipd3N4 stock *env*. Amplicons from control mAb-treated, DH378 mAb-treated and tri-mAb-treated animals are colored red, blue, and green, respectively. The scale bar represents 0.0008 nucleotide mutations per site. The black arrow indicates the SHIV-1157ipd3N4 challenge *env* sequence. SHIV proviral *env* sequences isolated from CD4<sup>+</sup> T cells in LH19 and LG73 submandibular LNs at 8 weeks post infection were included in the tree and are indicated by \*.
